# Supplementary material for: Synergy Disequilibrium Plots: graphical visualization of pairwise synergies and redundancies of SNPs with respect to a phenotype
Source: PubMed Central journal article supplement — Bioinformatics. 2009 Mar 17;25(11):1445–6. doi: 10.1093/bioinformatics/btp159 (PMC2682510; doi:10.1093/bioinformatics/btp159), 2009-03-17
Supplement: btp159_1.pdf [file btp159_1.pdf]

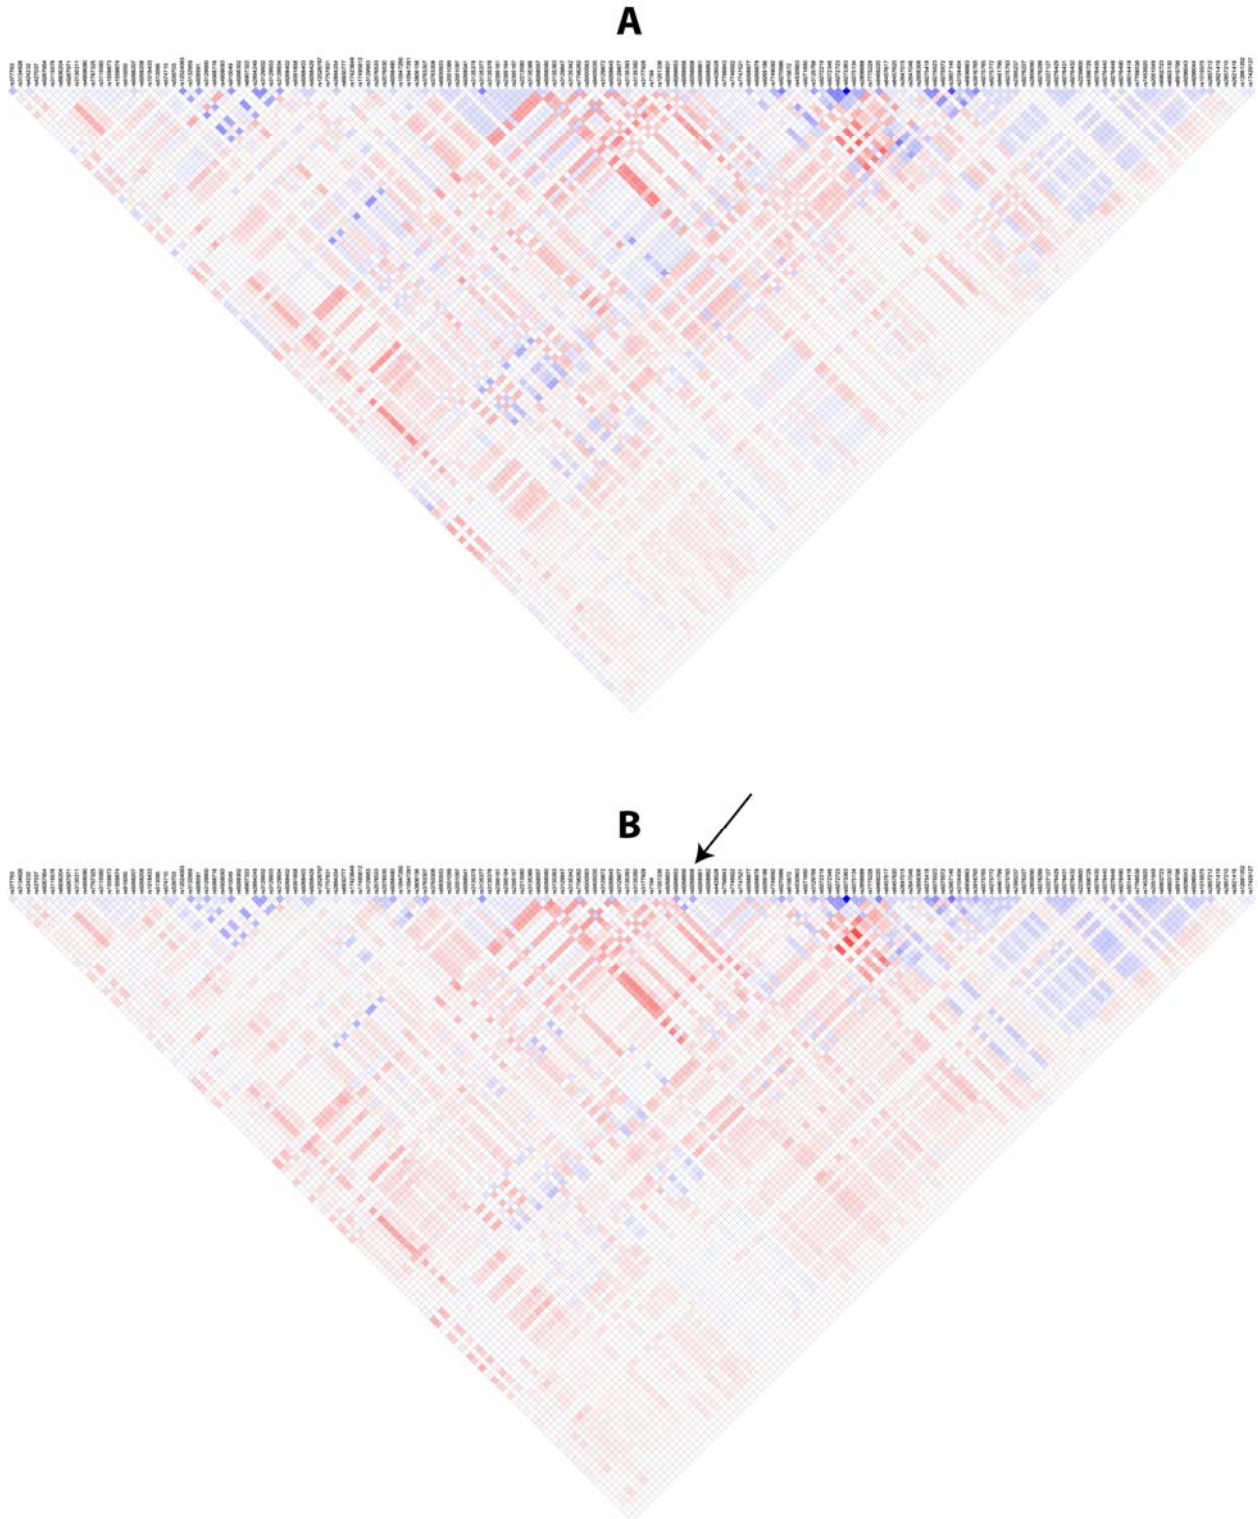

**Supplementary Figure.** (A) SD plot of MHC Class II genomic region for type 1 diabetes from the Wellcome Trust Case-Control Consortium dataset. (B) Corresponding SD plot from the Type 1 Diabetes Genetics Consortium dataset. The samples (cases and controls) of the two datasets are independent and do not overlap. The two plots are nearly indistinguishable. The arrow indicates one region of difference.
